# Supplementary material for: Effect of Dry-Aging on Quality and Palatability Attributes and Flavor-Related Metabolites of Pork Loins
Source: MDPI journal article supplement (doi:10.3390/foods10102503), 2021-10-19
Supplement: s1 [file s1]

**Table S1.** Demographic characteristics of consumers (n = 120) participated in the consumer sensory panels.

| Demographic Questions                                                          | Response options       | Frequency (%) |
|--------------------------------------------------------------------------------|------------------------|---------------|
| <i>Gender</i>                                                                  | Female                 | 63.3          |
|                                                                                | Male                   | 35.8          |
|                                                                                | Other                  | 0.9           |
| <i>Household Size</i>                                                          | 1 person               | 33.3          |
|                                                                                | 2 people               | 23.3          |
|                                                                                | 3 people               | 16.7          |
|                                                                                | 4 people               | 13.3          |
|                                                                                | 5 people               | 5.9           |
|                                                                                | >5 people              | 5.0           |
|                                                                                | Prefer not to disclose | 2.5           |
|                                                                                | Married                | 29.2          |
| <i>Marital Status</i>                                                          | Single                 | 70.0          |
|                                                                                | Prefer not to disclose | 0.8           |
| <i>Age</i>                                                                     | <20 years old          | 4.2           |
|                                                                                | 20 to 29 years old     | 70.0          |
|                                                                                | 30 to 39 years old     | 12.5          |
|                                                                                | 40 to 49 years old     | 3.3           |
|                                                                                | 50 to 59 years old     | 6.7           |
|                                                                                | >60 years old          | 3.3           |
|                                                                                | African-American       | 3.3           |
| <i>Ethnic Origin</i>                                                           | Asian                  | 30.0          |
|                                                                                | Caucasian/White        | 60.8          |
|                                                                                | Hispanic               | 2.5           |
|                                                                                | Mixed Race             | 2.5           |
|                                                                                | Other                  | 0.9           |
| <i>Annual Household Income</i>                                                 | <\$25,000              | 35.8          |
|                                                                                | \$25,000 to \$34,999   | 7.5           |
|                                                                                | \$35,000 to \$49,999   | 4.2           |
|                                                                                | \$50,000 to \$74,999   | 7.5           |
|                                                                                | \$75,000 to \$99,999   | 10.0          |
|                                                                                | \$100,000 to \$149,999 | 10.8          |
|                                                                                | \$150,000 to \$199,999 | 5.0           |
|                                                                                | >\$199,999             | 5.8           |
|                                                                                | Prefer not to disclose | 13.4          |
|                                                                                | Flavor                 | 45.8          |
| <i>When eating pork, what palatability trait is the most important to you?</i> | Juiciness              | 26.7          |
|                                                                                | Tenderness             | 27.5          |
|                                                                                | Medium-Rare            | 13.3          |
|                                                                                | Medium                 | 31.7          |
| <i>When eating pork, what degree of doneness do you prefer?</i>                | Medium-Well            | 25.8          |
|                                                                                | Well Done              | 26.7          |
|                                                                                | Not sure               | 2.5           |
|                                                                                | 1 Time/week            | 28.33         |
| <i>How many times per week do you consume pork?</i>                            | 2 Times/Week           | 25.83         |
|                                                                                | 3 Times/Week           | 15.83         |
|                                                                                | 4 Times/Week           | 9.17          |
|                                                                                | 5 Times/Week           | 5.83          |
|                                                                                | 6-10 Times/Week        | 10.0          |
|                                                                                | >10 Times /Week        | 2.5           |
